# Supplementary material for: Influenza A Virus Hemagglutinin is Required for the Assembly of Viral Components Including Bundled vRNPs at the Lipid Raft
Source: PubMed Central journal article supplement (PMC5035963; doi:10.3390/v8090249), 2016-09-10

# Supplementary Materials: Influenza A Virus Hemagglutinin is Required for the Assembly of Viral Components Including Bundled vRNPs at the Lipid Raft

Naoki Takizawa, Fumitaka Momose, Yuko Morikawa and Akio Nomoto

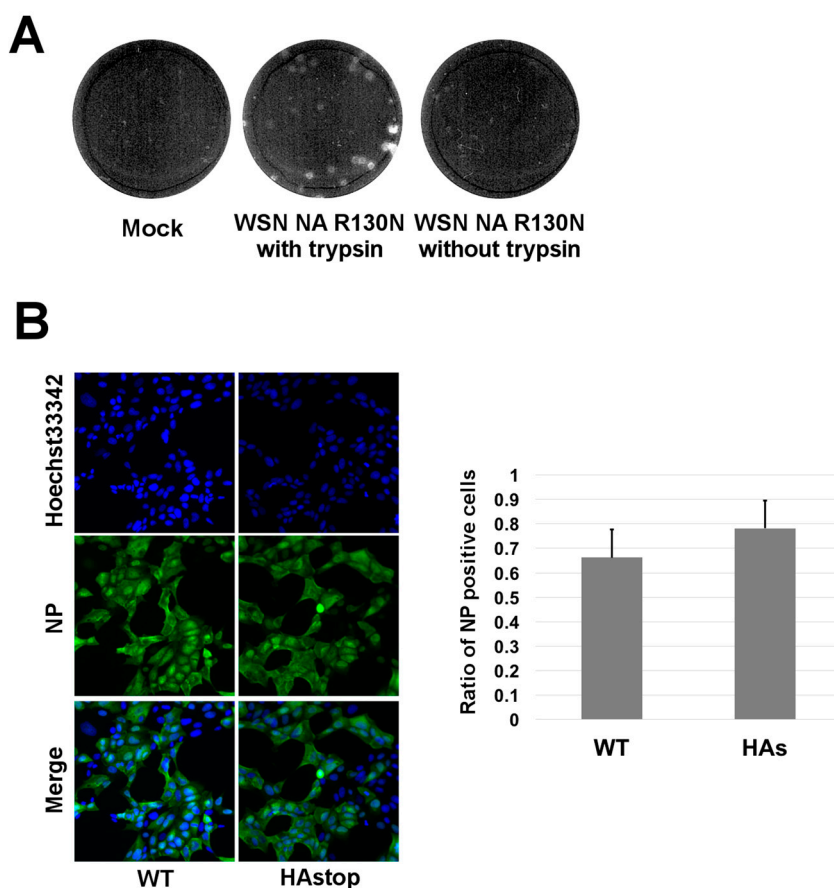

**Figure S1.** Infectivity of WSN NA R130N virus and HAstop virus (A) Trypsin dependent growth of WSN NA R130N virus. MDCK cells were infected or mock-infected with WSN NA R130N virus. After 1 hpi, MEM-0.8% agarose with or without 0.6  $\mu\text{g/ml}$  TPCK-trypsin were overlaid to the infected cells. The cells were incubated at 37°C for 2 days, and stained with 1% amido black. (B) The ratio of infected cells at an MOI of 1 infection. MDCK cells were infected with wild type (WSN NA R130N) or HAstop virus at an MOI of 1. At 10 hpi, the cells were fixed and NP was visualized using specific antibody and Alexa Fluor 488 conjugated anti-mouse Ig. Nucleus was visualized using Hoechst33342. The graph indicates average values of the ratio of NP positive cells to total cells with standard deviation of 10 independent views (about 150 cells/ view).

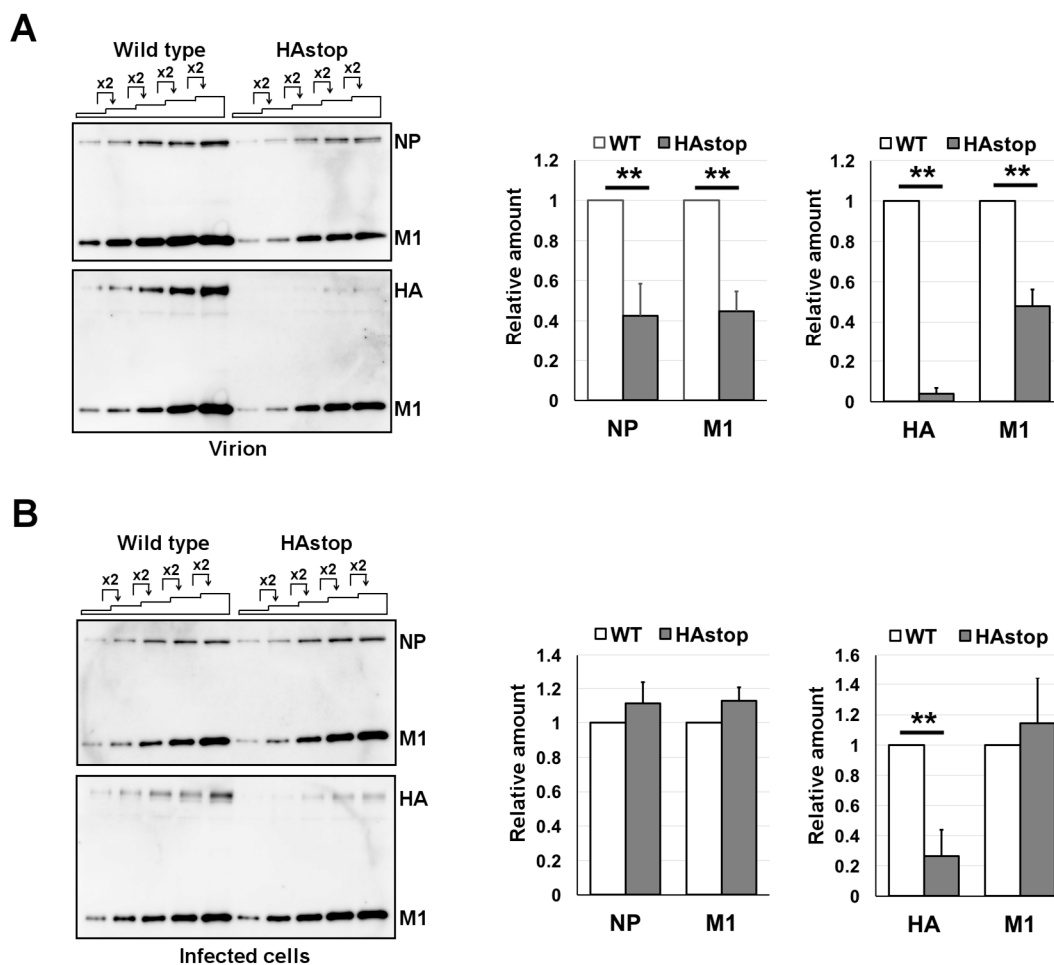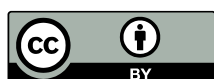

Supplement: viruses-08-00249-s001.pdf [file viruses-08-00249-s001.pdf]
